# Supplementary material
Source: publisher figshare collection journal article supplement (https://aacr.figshare.com/articles/dataset/_/23782453)

**Supplementary Figure S1- E2 induces changes in overlapping sets of genes in HCC-1428 and HCC-1428/LTED cells.** (A) Differentially expressed genes (FDR<0.05) were identified within each cell line by comparison of transcriptomes from cells treated  $\pm$  1 nM x 24 h. Overlap analysis indicated that 851 genes were altered by E2 treatment in both cell lines. (B) Relative expression levels of these 851 genes in all samples were analyzed by unsupervised hierarchical clustering and are shown as a heatmap.

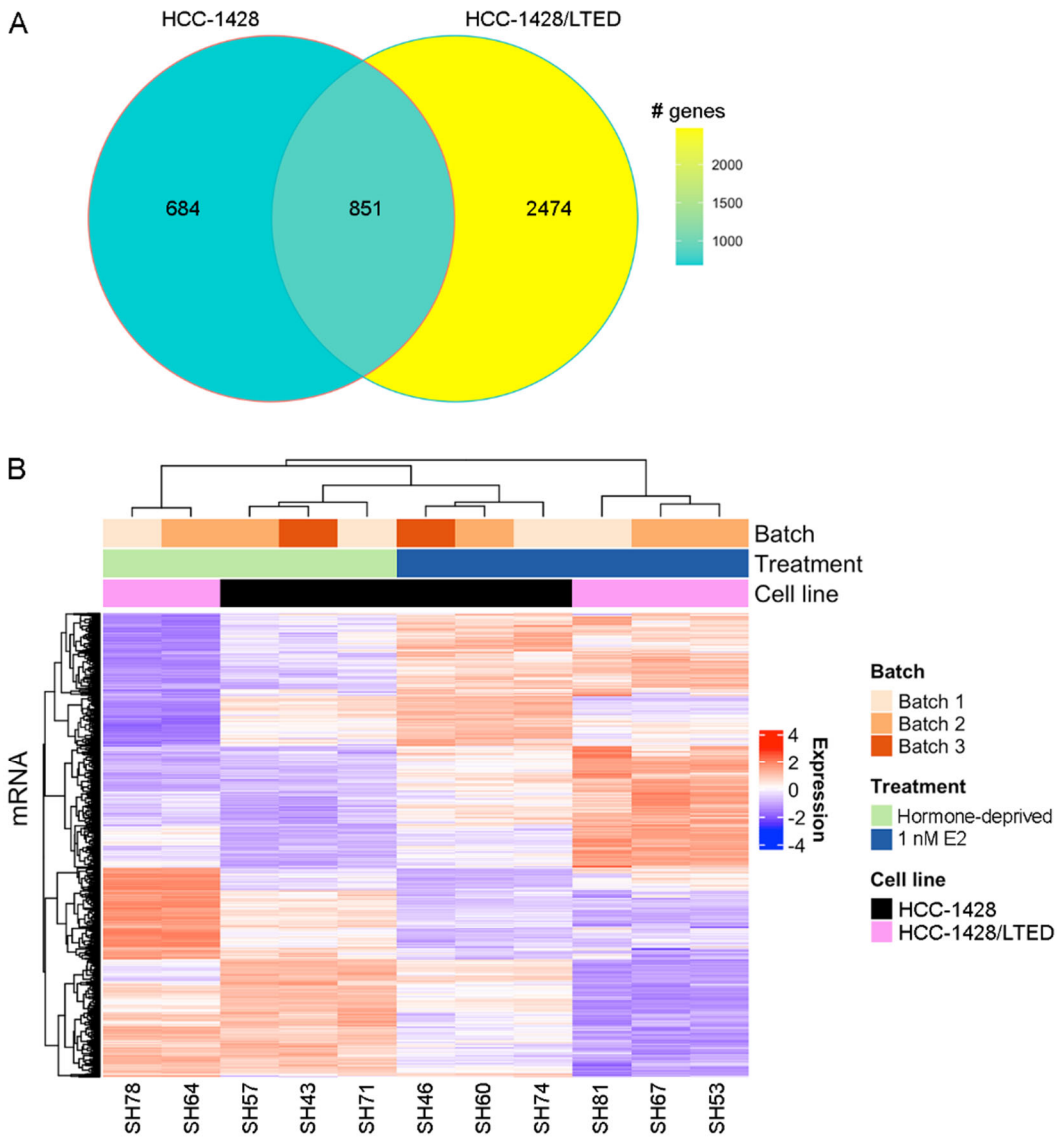

Supplement: Supplementary file 1 [file 41716030]
